# Supplementary material
Source: Research Square preprint supplement (doi:10.21203/rs.3.rs-9286602/v1)
Supplement: Supplementary file 1 [file fba09c3d1d4241d08f25d744.docx]

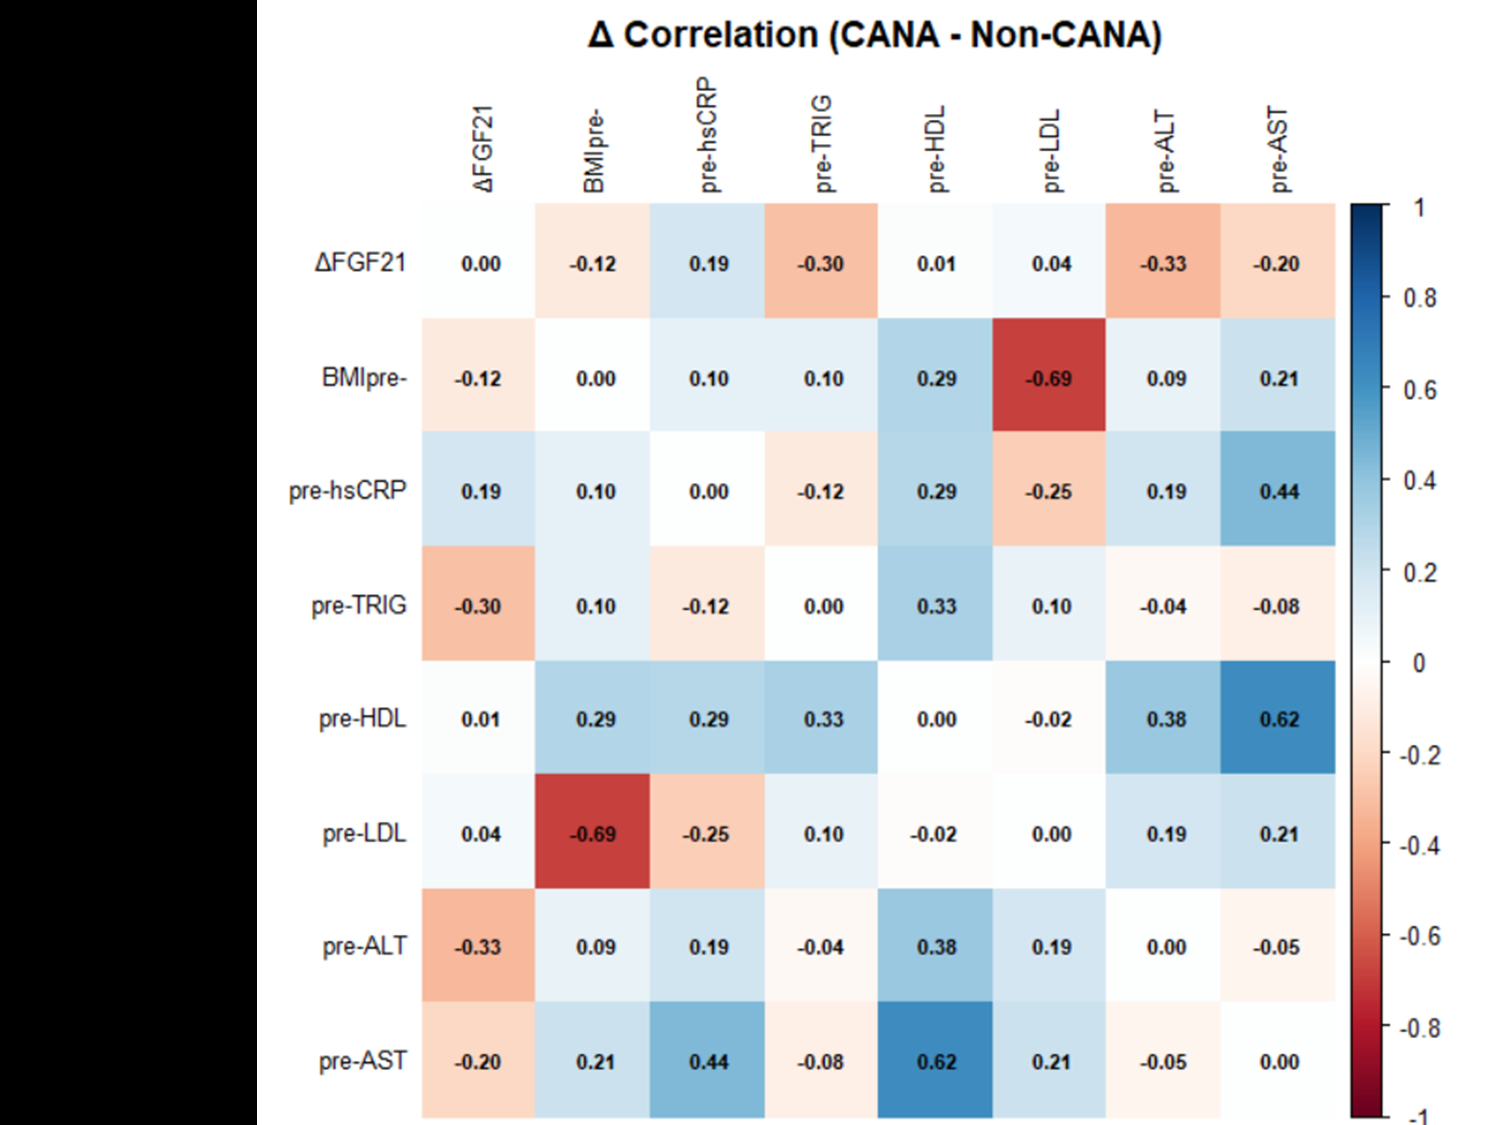


**Fig.S1**

**Fig. S1. Correlation matrix of changes in FGF21 and baseline clinical parameters.**

Heatmap illustrating Pearson correlation coefficients between the change in plasma FGF21 (ΔFGF21) and baseline (pre-) anthropometric and biochemical markers in the clinical cohort. Color intensity reflects the strength of the correlation ($r$), with blue representing positive and red representing negative correlations.


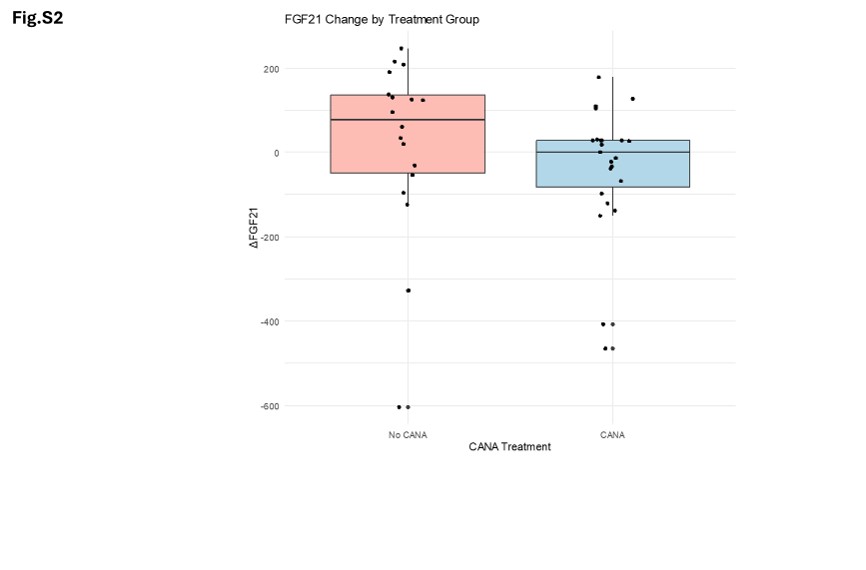


**Fig. S2. Distribution of plasma FGF21 changes stratified by treatment group.**

Boxplot comparing the magnitude of change in plasma FGF21 (ΔFGF21) between the non-CANA (n = 18) and CANA (n = 23) groups. Individual data points are superimposed on the boxes, representing the median, interquartile range, and whiskers.
